1 **Linking indices for biodiversity monitoring to extinction risk**

2 **theory**

3 Michael A. McCarthy<sup>1</sup>, Alana L. Moore<sup>1</sup>, Jochen Krauss<sup>2</sup>, John W. Morgan<sup>3</sup>,

4 Christopher F. Clements<sup>4</sup>

5 <sup>1</sup>*School of Botany, The University of Melbourne, Parkville, Victoria 3010, Australia*

6 <sup>2</sup>*Department of Animal Ecology and Tropical Biology, Biocentre, University of*

7 *Würzburg, Am Hubland, 97074 Würzburg, Germany*

8 <sup>3</sup>*Department of Botany, La Trobe University, Bundoora, Victoria 3086, Australia*

9 <sup>4</sup>*Department of Animal and Plant Sciences, University of Sheffield, Sheffield, S10*

10 *2TN, UK*

11

12 **Abstract**

13 Biodiversity indices often combine data from different species when used in  
14 monitoring programs. Heuristic properties can suggest preferred indices, but we lack  
15 objective ways to discriminate between indices with similar heuristics. Biodiversity  
16 indices can be evaluated by determining how well they reflect management objectives  
17 that a monitoring program aims to support. For example, the Convention on  
18 Biological Diversity requires reporting about extinction rates, so simple indices that  
19 reflect extinction risk would be valuable. Here we develop three biodiversity indices  
20 that are based on simple models of population viability that relate extinction risk to  
21 abundance. The first index is based on the geometric mean abundance of species. A  
22 second uses a more general power mean. A third integrates both the geometric mean  
23 abundance and trend. These indices require the same data as previous indices, but  
24 they also relate directly to extinction risk. Field data for butterflies and woodland  
25 plants, and experimental studies of protozoan communities show that the indices  
26 correlate with local extinction rates. Applying the index based on the geometric mean  
27 to global data on changes in avian abundance suggests that the average extinction  
28 probability of birds has increased approximately 1% from 1970 to 2009.

29

30 **Keywords:** biodiversity index, biodiversity measure, extinction risk, geometric mean.

31

## 32 **INTRODUCTION**

33 The importance of biodiversity for a healthy and equitable society has been  
34 acknowledged by over 190 countries that ratified the Convention on Biological  
35 Diversity (CBD). The convention has a specific target to reduce the extinction risk of  
36 species (Secretariat of the Convention on Biological Diversity 2010), so monitoring of  
37 species extinction is important. Reporting actual extinctions, while potentially  
38 informative, is retrospective, whereas the convention and many other biodiversity  
39 programs seek to reduce future extinctions. Further, retrospective assessments are  
40 subject to error because the fate of species is known imprecisely (Collar 1998; Keith  
41 & Burgman 2004; Rout et al. 2010). Hence, biodiversity monitoring programs would  
42 be more valuable if they can be interpreted in terms of extinction risk.

43 Changes in the assessed risk to species can contribute to biodiversity monitoring. For  
44 example, the IUCN Red List is used to calculate the Red List Index (RLI, Butchart et  
45 al. 2007), one of four global indicators of biodiversity status and trends approved by  
46 the CBD (Jones et al. 2011). The relationships of the other three indicators (extent of  
47 forest; protected-area coverage; and the Living Planet Index, LPI, Jones et al. 2011) to  
48 extinction risk are not explicit.

49 Buckland et al. (2005) identified three aspects of species diversity that are of primary  
50 interest when monitoring changes over time: number of species, overall abundance  
51 and species evenness, from which they derived six desirable criteria for an index of  
52 biodiversity based on abundance data. On evaluating several proposed indices against  
53 these criteria, the geometric mean of relative abundances was one of only two that  
54 met all six criteria, with van Strien et al. (2012) lending further support to the  
55 geometric mean.

56 While we agree with the heuristic properties used to assess different indices of  
57 biodiversity, a good index should also be clearly related to particular management  
58 objectives or biodiversity outcomes. For example, where extinction risk is the  
59 management concern, understanding how the index reflects changes in this risk would  
60 be desirable. In the absence of a single measurable definition of biodiversity  
61 (Secretariat of the Convention on Biological Diversity 2010; Jones et al. 2011), we  
62 aim to examine how abundance data might be used to monitor extinction rates of  
63 species for the purposes of reporting under the CBD and other biodiversity programs.

64 Here, we use simple models of population viability to develop three indices of  
65 extinction risk based on abundance data. These indices are designed to have the same  
66 data requirements as those considered by Buckland et al. (2005), but with the  
67 additional benefit of being directly related to extinction risk. We evaluate the indices  
68 using simulation, field data on local extinctions of butterflies and woodland plants,  
69 and experimental data on protozoan communities. Finally, we interpret changes in the  
70 LPI in terms of changes in the average probability of extinction of species.

## 71 **Methods**

72 The indices are derived from simple models of population viability, using clearly  
73 articulated assumptions that can be tested. First, consider the case when the long-term  
74 average population growth of each species is negative. If we assume that each species  
75 is experiencing deterministic exponential decline, then

$$76 \quad x(t) = x(0)\lambda^t,$$

77 where  $x(t)$  is population abundance at time  $t$ , and  $\lambda$  is the growth parameter ( $\lambda < 1$  for  
78 a declining population). It is then straightforward to calculate that extinction (such

79 that  $x(t) = 1$  occurs at time  $T = -\ln[x(0)]/\ln[\lambda]$ . If the long-run growth rate is  
80 negative, then for stochastic population models the mean extinction time is also  
81 approximately logarithmically dependent on initial population size (Lande 1993).

82 With the simplifying assumption that the rate of decline is the same for each species  
83 (we address this particular assumption later), the mean expected time to extinction,  
84 averaging over  $n$  species, is proportional to the mean of the logarithm of population  
85 abundance. As we show below, the mean expected time to extinction is proportional  
86 to the logarithm of the geometric mean of population abundances ( $M_0$ );

$$\begin{aligned} 87 \quad \bar{T} &\propto \overline{\ln(x)} = \frac{1}{n} \sum_{i=1}^n \ln(x_i) \\ 88 \quad &= \ln \left( \left[ \prod_{i=1}^n x_i \right]^{1/n} \right) \\ 89 \quad &= \ln(M_0). \end{aligned} \tag{1}$$

90 Equation 1 relates the mean time to extinction to the geometric mean abundance.  
91 However, it would be helpful to determine how this index might relate to the  
92 proportion of species going extinct. We approximate this by assuming that times to  
93 extinction have an exponential distribution. The proportion of species going extinct  
94 within time  $t$  is then  $1 - \exp(-t/\bar{T})$ . When this proportion is  $\leq 0.2$ , it can be  
95 approximated by  $t/\bar{T}$ , leading to:

$$96 \quad I_g = \frac{1}{\ln(M_0)}. \tag{2}$$

97 This index should correlate linearly with the proportion of species going extinct under  
98 the assumptions stated above. The approximation of  $1 - \exp(-t/\bar{T})$  by  $t/\bar{T}$  will tend to  
99 lead to non-linearity (but a monotonic relationship) for higher risks.

100 We develop a second index based on a different set of assumptions. We consider a  
101 stochastic population model in which the logarithm of the population growth rate has  
102 a normal distribution with a mean of zero and variance  $\sigma^2$ . For this model, the risk of  
103 extinction within a given time period  $t$  is (Ginzburg et al. 1982; Dennis et al. 1991;  
104 McCarthy & Thompson 2001):

$$105 \quad q_i(x_0) = 2\varphi(-\nu) .$$

106 where  $\varphi()$  is the standard normal cumulative distribution function,  $\nu = -\ln(1/x_0)/(\sigma\sqrt{t})$   
107 and  $x_0$  is the initial population size. This functional form could be used as an index,  
108 but it does not provide a simple numerical solution. Instead, we approximated this  
109 equation by a function of the form  $A x^{-B/(\sigma\sqrt{t})}$  (by approximating  $\log(q_i(x_0))$  as a linear  
110 function of  $\log(x)$ ) with the values of  $A$  and  $B$  depending on the value of the extinction  
111 risk. For small extinction risks,  $q_i < \approx 0.15$ ,  $A = 2.2$  and  $B = 1.87$  provide a good  
112 approximation. When the extinction risk is close to one, a better approximation is  $A$   
113  $= 1$  and  $B = 0.798$ . Regardless, the probability of extinction scales approximately with  
114 abundance in proportion to  $x^{-b}$ , with  $b = B/(\sigma\sqrt{t})$ . Thus, averaged across  $n$  species, we  
115 would expect the proportion of species going extinct to be

$$116 \quad L = \sum_{i=1}^n q_i / n = k \sum_{i=1}^n x_i^{-b} / n = k(M_{-b})^{-b}, \quad (3)$$

117 where  $k$  is a constant of proportionality and  $M_{-b}$  is a power mean of abundance with  
118 power  $p = -b$ ,

119 
$$M_{-b} = \left( \frac{1}{n} \sum_{i=1}^n x_i^{-b} \right)^{-1/b}.$$

120 Consequently, our second index is based on a power mean of abundance:

121 
$$I_b = (M_{-b})^{-b}. \quad (4)$$

122 The value of  $b$  depends on the time horizon over which risks are assessed. If we  
123 consider a time horizon of  $T=100$  years and a standard deviation of  $\sigma=0.1$  (Dennis et  
124 al. 1991), the extinction risk of each species is likely to be relatively small (recall,  
125 zero mean growth rate), and  $b$  would be of the order  $1.8 \approx 2$ . The value of  $b$  will be  
126 larger for shorter time horizons.

127 A third index can be derived from the deterministic model that accounts for the  
128 population growth rate, in addition to population size. Noting again that the mean  
129 time to extinction under deterministic decline is  $-\ln[x(0)]/\ln[\lambda]$ , then the proportion of  
130 species going extinct can be approximated by  $-\ln[\lambda]/\ln(M_0)$ , allowing communities  
131 with different population growth rates of species to be compared. Using the mean of  
132 the logarithmic population growth rate of species within a community,  $\mu_r$ , as the  
133 estimate of  $\ln[\lambda]$  leads to the index:

134 
$$I_t = \frac{-\mu_r}{\ln(M_0)}. \quad (5)$$

135 This index requires extra data, being the population growth rates of species within the  
136 community. Such data might be uncommonly available, but are necessary to compare  
137 risks among communities where the species are declining at different rates.

138 **Simulations for evaluating indices**

139 We simulated stochastic species dynamics within communities to evaluate the  
140 correlation between the different indices and the proportion of species going extinct.  
141 Each community consisted of 500 species, and there were 100 different communities.  
142 For each species  $j$  in community  $i$ , we simulated the population dynamics over 20  
143 time steps using the exponential growth model such that the population size in time  
144  $t+1$  is given by:

$$145 \quad x_{ijt+1} = \lambda_{ijt} x_{ijt}.$$

146 Parameter values for the 100 different communities were chosen such that the  
147 proportion of species going extinct spanned a wide range (in our case between 0.02  
148 and 0.64). Within each community, the initial population size  $\ln x_{ij0}$  was drawn from a  
149 lognormal distribution with mean  $\mu_N$  and coefficient of variation  $c_N$ , and the  
150 logarithmic growth rate  $\ln \lambda_{ijt}$  was drawn from a normal distribution with mean  $\mu_r$  and  
151 standard deviation  $\sigma_r$ . The proportion of 500 species that fell to or below one  
152 individual measured the average extinction risk of the community.

153 To ensure that each community had different initial population sizes and different  
154 trends in abundance (and hence different average extinction risks), the mean and  
155 coefficient of variation of the population size ( $\mu_N$  and  $c_N$ ) and the mean and standard  
156 deviation of population growth rate ( $\mu_r$  and  $\sigma_r$ ) of each was varied among  
157 communities. The coefficient of variation  $c_N$  was drawn from a uniform distribution  
158 on the interval [0.5, 3.0]. The mean population size was equal to  $1.2^d 100$ , where  $d$  was  
159 drawn from a uniform distribution on the interval [0, 20], so mean population size  
160 varied among communities over the interval [100, 3834]. The mean population  
161 growth rate ( $\mu_r$ ) was drawn from a uniform distribution on the interval [-0.3, -0.1],



162 and the standard deviation ( $\sigma_r$ ) was drawn from a uniform distribution on the interval  
163 [0.05, 0.4]. To test how differences in abundance, rather than population trend,  
164 influence the performance of the indices, data were also simulated with  $\mu_r$  set to  $-0.2$   
165 for all communities.

166 The three indices of extinction risk ( $I_g$ ,  $I_b$  and  $I_t$ ) were calculated for the simulated  
167 communities and the correlations between these and the proportion of species going  
168 extinct was examined. The performance of the arithmetic mean abundance and the  
169 modified Shannon diversity index of Buckland et al. (2005), other putative  
170 biodiversity measures, were also examined for the simulated data. For these two  
171 cases, we multiplied the indices by  $-1$  so that the indices would be expected to be  
172 positively correlated with extinction risk.

### 173 **Data for evaluating indices**

174 The correlation between the indices and local extinction risk was evaluated using field  
175 data on Lepidoptera (Krauss et al. 2003) and woodland plants (Sutton & Morgan  
176 2009). Because data on population trends were unavailable for these datasets, only  
177 eqns 2 and 4 were evaluated. We evaluated all three indices with data from  
178 experimental protozoan communities (Clements et al. 2013). The original publications  
179 detail the data and its collection; some information is provided here for context (see  
180 also Supporting Information). The data sets we examined reported both extinctions of  
181 multiple species and information on initial abundances.

182 Each dataset included information on the abundance of each of the species in replicate  
183 local communities at a particular point in time, and data on the proportion of those  
184 species that went extinction over a subsequent period of time. For the protozoan

185 community, estimates of abundance were available at multiple points in time prior to  
186 the period over which extinctions were assessed. For each dataset, we calculated the  
187 indices using the abundance data (and the trend data in the case of the index  $I_t$  for the  
188 protozoan dataset).

189 For each dataset, we calculated the correlation (with 95% confidence interval based  
190 on a  $z$ -transformation; Sokal & Rohlf 1981) between the value of each index and the  
191 proportion of species in each community going extinct. We also determined, via  
192 simulation, the correlations that would be expected if each index were perfectly  
193 correlated with extinction of species, while accounting for the finite number of  
194 species in each community (Supporting Information). This allowed us to determine  
195 whether the observer correlations were substantially different from what would be  
196 expected given the limitations of the datasets.

### 197 **Relating $I_g$ to the Living Planet Index**

198 The LPI is the geometric mean abundance of vertebrate species in a particular year  
199 divided by the geometric mean in 1970 (Loh et al. 2005; Collen et al. 2009).

200 Therefore, the index based on the geometric mean can be related to the LPI simply as  
201  $I_g = 1/\ln(c \text{ LPI})$ , where  $c$  is the geometric mean abundance in 1970. If  $I_g$  is  
202 proportional to the probability of extinction, as assumed in its derivation, LPI values  
203 can be converted to proportional changes in the probability of extinction of species,  
204 which will equal  $-\ln(\text{LPI}) / [\ln(c) + \ln(\text{LPI})]$ . We calculated this quantity for the  
205 world's birds based on published avian LPI values (Baille et al. 2010).

206 These proportional changes depend on  $c$ , which is not well known. The arithmetic  
207 mean abundance of birds is thought to be approximately 10 million individuals per  
208 species but, because species abundance distributions are heavily right-skewed, the

209 geometric mean will be substantially less (Gaston & Blackburn 2003). We estimated  
210 the global species abundance distribution of birds, and hence the geometric mean, by  
211 fitting a log-normal distribution to data on reported population size for the global list  
212 of 1253 threatened species on BirdLife International's website  
213 (<http://www.birdlife.org/datazone/species/search>; accessed 20 December 2011) and  
214 assuming an arithmetic mean of 10 million birds per species. We assumed that  
215 abundances of the remaining 8663 non-threatened species were greater than 1000. In  
216 this case, and in cases where the data on threatened species were provided as ranges,  
217 we fitted the model assuming censored data. When an upper limit was not provided,  
218 we set the upper limit of 10 billion individuals for each species, which is greater than  
219 the reported abundance of passenger pigeons, the world's most abundant bird prior to  
220 its extinction. The geometric mean of the resulting log-normal probability distribution  
221 was then calculated. The sensitivity of the results to the calculated value of  $c$  was  
222 examine by varying  $c$  by one order of magnitude and re-calculating the proportional  
223 changes in the probability of extinction.

## 224 **Results**

225 For the simulated communities with variation in mean growth rate among  
226 communities, the index based on the power mean ( $I_b$ ) and the index based on the  
227 geometric mean ( $I_g$ ) were positively correlated with the proportion of species going  
228 extinct (Pearson product moment correlations  $r = 0.39$  and  $r = 0.50$ , respectively).  
229 Spearman rank correlations were similar ( $r_s = 0.34$  and  $0.49$  respectively). Variation  
230 in mean growth rates among communities explained much of the imperfect  
231 correlations; correlations for the index that is based on population trend were high ( $r =$   
232  $0.96$ ;  $r_s = 0.99$  for  $I_t$ ), and were similarly high for the geometric mean index ( $I_g$ ) when

233 all communities had the same mean rate of decline ( $r = 0.97$  when  $\mu_r = -0.2$  for all  
234 communities).

235 The index based on the geometric mean ( $I_g$ ) and the index that considers population  
236 trend ( $I_t$ ) were more strongly correlated with the proportion of species going extinct  
237 than either index based on the arithmetic mean or the Shannon diversity ( $r = 0.44$  in  
238 both cases when  $\mu_{r,i}$  varied on the interval  $[-0.3, -0.1]$ , and  $r = 0.94$  and  $0.91$   
239 respectively when  $\mu_{r,i}$  was  $-0.2$  for all communities). The index based on the power  
240 mean ( $I_b$ ) was the least strongly correlated with the proportion of species going extinct  
241 ( $r = 0.39$  when the mean population growth rate varied among communities,  $r = 0.66$   
242 when it was consistent); this might be expected given the strong influence of the  
243 population trend on the simulated extinction risks, whereas the index  $I_b$  assumed no  
244 trend. Note, the derivation of  $I_g$  included a trend, but it dropped out of the calculation  
245 of the index as a proportionality constant by assuming the same trend for all  
246 communities.

247 For the real communities, the index based on the geometric mean abundance ( $I_g$ ) and  
248 the index based on the power mean ( $I_b$ ) were positively correlated with the proportion  
249 of Lepidoptera and woodland plant species that went extinct (Fig. 1a,c; Fig. 2). The  
250 95% confidence intervals for these correlation coefficients did not encompass zero. In  
251 contrast, the correlations for these indices were negative for the protozoan dataset  
252 (Fig. 1e,f), although the correlation for the index that included population trends was  
253 positive ( $r=0.33$ ; Fig. 1g, Fig. 2). In this dataset, abundances were similar for most  
254 communities, so the indices spanned a narrow range of values. The 95% confidence  
255 intervals for the correlation coefficient were wide (Fig. 2), so the strength of the  
256 relationship could not be determined reliably for the protozoan dataset.

257 There was only one case (the index based on the power mean for the protozoan  
258 dataset) that the observed correlation coefficient was both not significantly different  
259 from zero (Fig. 2) and substantially less than the correlation coefficient that might be  
260 expected even if the indices were perfectly correlated with the proportion of species  
261 going extinct (Fig. S1). In the other cases, either the 95% confidence intervals of the  
262 observed correlations were greater than zero (Fig. 2), or the observed correlations  
263 were consistent with the range of values that might be expected (Fig S1).

264 The geometric mean abundance ( $c$ ) of birds was estimated to be approximately  
265 100,000 individuals per species. Assuming that the index based on the geometric  
266 mean is proportional to the extinction risk of species at the global scale, the reported  
267 decline in the LPI for birds from 1970 to 2009 of 13% (Baillie et al. 2010) reflects a  
268 proportional increase in the probability of extinction of approximately 1% for values  
269 of  $c$  between 10,000 and 1,000,000 (Fig. 3). Smaller values of  $c$  imply larger changes  
270 in the risk of extinction for a given change in LPI, although the results are relatively  
271 insensitive to the choice of  $c$  (Fig. 3), and are primarily driven by the LPI values (Fig.  
272 S2).

## 273 **Discussion**

274 We derived indices that can be interpreted in terms of changes in extinction risk. By  
275 deriving the indices from theoretical population models, the merits of possible  
276 alternative indices can be assessed to determine which indices are best supported by  
277 data. Our analysis shows that the indices are positively correlated with the proportion  
278 of species going extinct in small patches, despite highly simplified assumptions used  
279 to build the indices.

280 In addition to the heuristic properties that Buckland et al. (2005) and van Strien et al.  
281 (2012) used to assess different indices of biodiversity, a good index should also be  
282 clearly related to particular management objectives. For example, we have shown that  
283 the geometric mean abundance of species, which has good heuristic properties  
284 (Buckland et al. 2005; van Strien et al. 2012), can be related to the proportion of  
285 species within an area that are likely to become extinct. This lends much greater  
286 support to this index as a biodiversity metric.

287 The geometric mean abundance of species is used increasingly, including in North  
288 American and European bird monitoring (Gregory & van Strien 2010; Butchart et al.  
289 2010) and for planning fire management (Di Stefano et al. 2013). The LPI for  
290 reporting the state of species is the geometric mean abundance in each period, divided  
291 by the geometric mean abundance in the first time period (Loh et al. 2005; Collen et  
292 al. 2009). The LPI is based on the notion that changes in species abundance are  
293 important, but was not derived directly from ecological theory. We do not intend this  
294 as a particular criticism of the LPI, which has more support than some alternative  
295 indices, but we argue that ecological indices should have sound theoretical  
296 foundations. A theoretical foundation helps make the meaning and scope of the index  
297 clearer and more easily justified. For example, the derivation of the index based on  
298 the geometric mean implies that reductions in the LPI can be interpreted in terms of  
299 an increased average probability of extinction of the species. We estimate that the  
300 reduction of the global avian LPI of approximately 13% between 1970 and 2009  
301 corresponds to approximately a 1% increase in the probability of extinction (Fig. 6).  
302 This is less than the increased risk of 7% implied by the Red List Index (RLI) of birds  
303 for the period 1988 to 2004 (Butchart et al. 2004), which is the only CBD index that is

304 related directly to extinction. The larger increase in extinction risk implied by the RLI  
305 compared with  $I_g$  might be expected given the RLI's focus on threatened species.

306 The indices based on the power mean ( $I_b$ ) and geometric mean ( $I_g$ ) have the same data  
307 requirements as those considered by Buckland et al. (2005). That is, they require  
308 information on the abundance of a suite of species at a particular point in time. The  
309 index that accounts for different trends among communities, ( $I_t$ ) requires additional  
310 information (the average trend of the species in the community). Such data will tend  
311 to be available for only a subset of species, and this subset is likely to be a biased  
312 sample of relevant species in a community. Any bias will be common to all indices,  
313 with the consequence that they might not broadly represent all possible species of  
314 interest.

315 Using a theoretical foundation to develop indices suggests ways in which the indices  
316 can be evaluated and improved, and assumptions underlying the indices are clear. The  
317 clear assumptions can be tested individually to determine whether they are violated in  
318 particular circumstances and the consequences of those errors. Further, the overall  
319 properties of an index can be assessed against data if it approximates an explicit  
320 quantity. In our case, we sought an index that would be linearly correlated with the  
321 proportion of species becoming extinct such that a change in the index would reflect a  
322 particular change in the proportion of species going extinct. The clear assumptions  
323 help highlight how the indices could be modified.

324 As an example of modification, trends in population size are likely to influence  
325 extinction risks. The index that incorporates trend ( $I_t$ ) shows how abundance and trend  
326 might be incorporated into a single index if the assumption of a consistent trend  
327 among communities is not supported. In the case of the experimental protozoan

328 community, an assumption of an equal trend is clearly not supported. Of the four  
329 protozoan species, one went extinct in all 40 experimental replicates, and one  
330 persisted in all replicates. Thus, the proportion of species in each community that  
331 went extinct was influenced substantially by the identity of the species, which had  
332 different trends not just different population sizes.

333 Biodiversity indices, such as those developed here, will be sensitive to the choice of  
334 species that are included. For example, species included in the LPI calculations are  
335 not a random sample of all possible species, with biases likely. Unless the scheme  
336 used to select the sample of species used in the index is considered carefully, it will be  
337 unclear how the selected species will represent the broader suite of biodiversity.

338 Factors other than those included in the indices are likely to influence extinction. The  
339 Lepidoptera species will be differentially susceptible to apparent local extinction  
340 because of different dispersal and abilities to persist outside the focal habitat patches.  
341 Other species will occur only ephemerally in the patches, reducing the influence of  
342 abundance on local extinction. However, the results were qualitatively identical when  
343 analysing only strict grassland specialists, so we reported only the results for the  
344 larger collection of species.

345 Our indices were based on models of exponential decline of single populations,  
346 thereby ignoring spatial aspects and density-dependence. Other indices based on  
347 metapopulation dynamics, for example, could be developed to account for spatial  
348 effects. Indeed, metapopulation capacity, which is derived from colonisation and  
349 extinction dynamics of habitat patches (Day & Possingham 1995; Hanski &  
350 Ovaskainen 2000), can be viewed as an index of metapopulation persistence  
351 (Moilanen & Nieminen 2002). Density-dependence might be less important for



352 populations that are declining deterministically, although accounting for non-  
353 exponential decline might be important because temporal patterns of decline influence  
354 risk (Di Fonzo et al. 2013).

355 Imprecise estimation of abundance (particularly in the woodland case study), some  
356 residual uncertainty about the local extinction of species due to imperfect detection,  
357 and the false assumption of equivalent dynamics of all species would all weaken the  
358 correlation between the indices and the observed extinction rate. Despite this, the  
359 predicted and observed extinction risks were correlated (Figs 1-3). This implies that  
360 using the indices to aggregate data across species is reasonable. However, further tests  
361 of the indices to predict local extinction would be valuable, as would evaluating  
362 extinction risk over regions larger than just single patches (e.g., based on spatial  
363 population dynamics).

364 The index based on the power mean is sensitive to the choice of the parameter  $b$ , and  
365 estimating it via estimates of the standard deviation of the population growth rate ( $\sigma$ )  
366 might be difficult. Thus, the indices based on the geometric mean ( $I_g$  and  $I_t$ ) might be  
367 more appealing because a freely-varying parameter does not require estimation.  
368 Further, extinctions might be dominated by deterministic declines rather than random  
369 fluctuation around a zero mean growth rate. If true, the indices based on the geometric  
370 mean might be preferred over that based on the power mean.

371 The SAFE index (Clement et al 2011; see also Akçakaya et al. 2011; Beissinger et al.  
372 2011; McCarthy et al. 2011) is essentially equal to the logarithm of population size.  
373 Our analysis shows, therefore, that the SAFE index will be proportional to the  
374 expected time to quasi-extinction (time to reaching a given threshold). But it also  
375 shows that the SAFE index will be comparable among species as a measure of threat

376 only if trends in population size of those species are similar. Where trends differ  
377 among species, an index based on  $-\ln[x(0)]/\ln[\lambda]$  is likely to better reflect threat.  
378 Further, prioritization of management, which apparently motivated the SAFE index,  
379 should not be based on extinction risk, but on the ability to change risks (McCarthy et  
380 al. 2011). This might be assessed, for example, by the relative cost of changing  $x(0)$  or  
381  $\lambda$  and their influence on  $-\ln[\lambda]/\ln[x(0)]$  (Baxter et al. 2006).

382 An index developed without theory does not mean it will have poor properties. As we  
383 have seen, the geometric mean was developed without theory but appears to have  
384 useful properties (Buckland et al. 2005; van Strien et al. 2012). The demonstrated  
385 relationship to extinction risk lends further support to the geometric mean. Our  
386 analysis also indicates how the geometric mean might incorporate population trends.  
387 We suggest that biodiversity indices should be developed more frequently from  
388 theoretical foundations to provide more explicit links between the index, the data  
389 underlying the index, and the meaning of changes in the index. Such indices will  
390 inevitably exclude factors that might be important; this is a feature of any model.  
391 However, stronger theoretical foundations for biodiversity indices would clarify the  
392 features that are considered and those that are ignored, and would allow the indices to  
393 be more easily evaluated and improved.

#### 394 **Acknowledgments**

395 This research was supported by an Australian Research Council (ARC) Future  
396 Fellowship to M.A.M. (FT100100923), and the ARC Centre of Excellence for  
397 Environmental Decisions. We thank J. Baumgartner for help with collating the data  
398 on bird abundances, B. Collen for providing values for the Living Planet Index of

399 birds, and J. Moore, R. Gregory, R. Camp and two anonymous reviewers for  
400 comments on a draft manuscript.

#### 401 **Supporting Information**

402 Further details on the datasets used (Appendix S1), details on calculating the expected  
403 correlation (Appendix S2), and Figs S1 and S2 are available online. The authors are  
404 solely responsible for the content and functionality of these materials. Queries (other  
405 than absence of the material) should be directed to the corresponding author.

#### 406 **Literature Cited**

407 Akçakaya, H.R., G. M. Mace, K. J. Gaston, H. Regan, A. Punt, S. H. M. Butchart, D.

408 A. Keith, and U. Gärdenfors. 2011. The SAFE index is not safe. *Frontiers in*  
409 *Ecology and Environment* **9**:485-486.

410 Baillie, J. E. M., J. Griffiths, S. T. Turvey, J. Loh, and B. Collen. 2010. *Evolution*  
411 *Lost: Status and Trends of the World's Vertebrates*. Zoological Society of  
412 London, UK.

413 Baxter, P. W. J., M. A. McCarthy, H. P. Possingham, P. W. Menkhorst, and N.  
414 McLean. 2006. Accounting for management costs in sensitivity analyses of matrix  
415 population models. *Conservation Biology* **20**:893-905.

416 Beissinger, S. R., C. H. Flather, G. D. Hayward, and P. A. Stephens. 2011. No safety  
417 in numbers. *Frontiers in Ecology and Environment* **9**:486.

418 Buckland, S. T., A. E. Magurran, R. E. Green, and R. M. Fewster. 2005. Monitoring  
419 change in biodiversity through composite indices. *Philosophical Transactions of*  
420 *the Royal Society B-Biological Sciences* **360**:243-254.

- 421 Butchart, S. H., H. R. Akçakaya, J. Chanson, J. E. Baillie, B. Collen, S. Quader, W. R.  
422 Turner, R. Amin, S. N. Stuart, C. Hilton-Taylor. 2007. Improvements to the Red  
423 List Index. PLoS ONE **2**(1): e140. doi:10.1371/journal.pone.0000140.
- 424 Butchart, S. H. M., et al. 2010. Global biodiversity: indicators of recent declines.  
425 Science **328**:1164-1168.
- 426 Clements, G. R., C. J. A. Bradshaw, B. W. Brook, and W. F. Laurance. 2011. The  
427 SAFE index: using a threshold population target to measure relative species threat  
428 Frontiers in Ecology and Environment **9**:521-525.
- 429 Clements, C. F., N. Worsfold, P. Warren, B. Collen, T. Blackburn, N. Clark, and O.  
430 L. Petchey. 2013. Experimentally testing an extinction estimator: Solow's Optimal  
431 Linear Estimation model. Journal of Animal Ecology **82**:345-354.
- 432 Collar, N. J. 1998. Extinction by assumption; or, the Romeo Error on Cebu. Oryx  
433 **32**:239-244.
- 434 Collen, B., J. Loh, S. Whitmee, L. McRae, R. Amin, and J. E. M. Baillie. 2009.  
435 Monitoring change in vertebrate abundance: the Living Planet Index.  
436 Conservation Biology **23**:317-327.
- 437 Day, J. R., and H. P. Possingham. 1995. A stochastic metapopulation model with  
438 variability in patch size and position. Theoretical Population Biology **48**: 333-360.
- 439 Dennis, B., P. L. Munholland, and J. M. Scott. 1991. Estimation of growth and  
440 extinction parameters for endangered species. Ecological Monographs **61**:115-  
441 143.

- 442 Di Fonzo, M., B. Collen, and G. M. Mace. 2013. A new method for identifying rapid  
443 decline dynamics in wild vertebrate populations. *Ecology and Evolution* **3**:2378-  
444 2391.
- 445 Di Stefano, J., M. A. McCarthy, A., York, T.J. Duff, J. Slingo, and F. Christie. 2013.  
446 Defining vegetation age class distributions for multispecies conservation in fire-  
447 prone landscapes. *Biological Conservation* **166**:111-117.
- 448 Gaston, K. J., and T. M. Blackburn. 2003. Macroecology and conservation biology.  
449 Pages 345-367 in T.M. Blackburn, and K. J. Gaston, editors. *Macroecology:*  
450 *concepts and consequences*. Blackwell Science, Oxford.
- 451 Ginzburg, L. R., L. B. Slobodkin, K. Johnson, and A. G. Bindman. 1982.  
452 Quasiextinction probabilities as a measure of impact on population growth. *Risk*  
453 *Analysis* **2**:171-181.
- 454 Gregory R.D., and A. van Strien. 2010. Wild bird indicators: using composite  
455 population trends of birds as measures of environmental health. *Ornithological*  
456 *Science* **9**:3-22.
- 457 Hanski, I., and O. Ovaskainen. 2000. The metapopulation capacity of a fragmented  
458 landscape. *Nature* **404**: 755-758.
- 459 IUCN. 2001. *IUCN Red List Categories and Criteria: Version 3.1*. IUCN Species  
460 Survival Commission, Gland, Switzerland and Cambridge, UK,
- 461 Jones, J. P. G., et al. 2011. The why, what, and how of global biodiversity indicators  
462 beyond the 2010 target. *Conservation Biology* **25**:450-457.
- 463 Jost, L. 2006. Entropy and diversity. *Oikos* **113**:363-375.

- 464 Keith, D. A., and M. A. Burgman. 2004. The Lazarus effect: can the dynamics of  
465 extinct species lists tell us anything about the status of biodiversity? *Biological*  
466 *Conservation* **117**:41-48.
- 467 Krauss, J., I. Steffan-Dewenter, and T. Tschardt. 2003. Local species immigration,  
468 extinction, and turnover of butterflies in relation to habitat area and habitat  
469 isolation. *Oecologia* **137**:591-602.
- 470 Lande, R. 1993. Risks of population extinction from demographic and environmental  
471 stochasticity and random catastrophes. *American Naturalist* **142**:911-927.
- 472 Loh, J., R. E. Green, T. Ricketts, J. Lamoreux, M. Jenkins, V. Kapos, and J. Randers.  
473 2005. The Living Planet Index: using species population time series to track  
474 trends in biodiversity. *Philosophical Transactions of the Royal Society B-*  
475 *Biological Sciences* **360**:289-295.
- 476 Magurran, A. E. 2004. *Measuring biological diversity*. Oxford, Blackwell Science.
- 477 McCarthy, M. A., and C. Thompson. 2001. Expected minimum population size as a  
478 measure of threat. *Animal Conservation* **4**:351-355.
- 479 McCarthy, M.A., G. E. Garrard, A. L. Moore, K. M. Parris, T. J. Regan, and G. E.  
480 Ryan. 2011. The SAFE index should not be used for prioritization. *Frontiers in*  
481 *Ecology and the Environment* **9**:486-487.
- 482 Moilanen, A., and M. Nieminen. 2002. Simple connectivity measures in spatial  
483 ecology. *Ecology* **83**:1131-1145.

- 484 Rout, T. M., D. Heinze, and M. A. McCarthy. 2010. Optimal allocation of  
485 conservation resources to species that may be extinct. *Conservation Biology*  
486 **24**:1111-1118.
- 487 Secretariat of the Convention on Biological Diversity. 2010. *Global Biodiversity*  
488 *Outlook 3*. Secretariat of the Convention on Biological Diversity, Montreal,  
489 Canada.
- 490 Sokal, R. R., and F. J. Rohlf. 1981. *Biometry*, 2nd edition. Freeman, New York.
- 491 Sutton, F. M., and J. W. Morgan. 2009. Functional traits and prior abundance explain  
492 native plant extirpation in a fragmented woodland landscape. *Journal of Ecology*  
493 **97**:718-727.
- 494 van Strien, A. J., L. Soldaat, and R. D. Gregory. 2012. Desirable mathematical  
495 properties of indicators for biodiversity change. *Ecological Indicators* **14**:202-208.
- 496

497 Figure 1. Relationship between the three different indices ( $I_g$ ,  $I_b$ ,  $I_t$ ) and the proportion  
498 of species going locally extinct for the three case studies: (a-b) for Lepidoptera; (c-d)  
499 for woodland plants; and (e-g) for protozoan communities. Each point represents a  
500 patch for the field studies (Lepidoptera and woodland plants) or the average of each  
501 type of community for the protozoan. The lines are linear regressions. Correlation  
502 coefficients with 95% confidence intervals are given in Fig. 2.

503 Figure. 2. Observed correlation between the three indices ( $I_g$  based on the geometric  
504 mean;  $I_b$  based on the power mean; and  $I_t$  based on the geometric mean and trend) and  
505 the proportion of species going extinct from a community. Results are shown for each  
506 of the three different datasets (butterflies, plants, protozoa). The circles are the  
507 observed correlation coefficients and the bars are 95% confidence intervals.

508

509 Figure 3. Proportional changes in the probability of extinction from levels in 1970  
510 based on changes in the Living Planet Index for birds (Baille et al. 2010) assuming  
511 values for the geometric mean abundance in 1970 of 10,000, 100,000 or 1,000,000  
512 individuals.

513

514



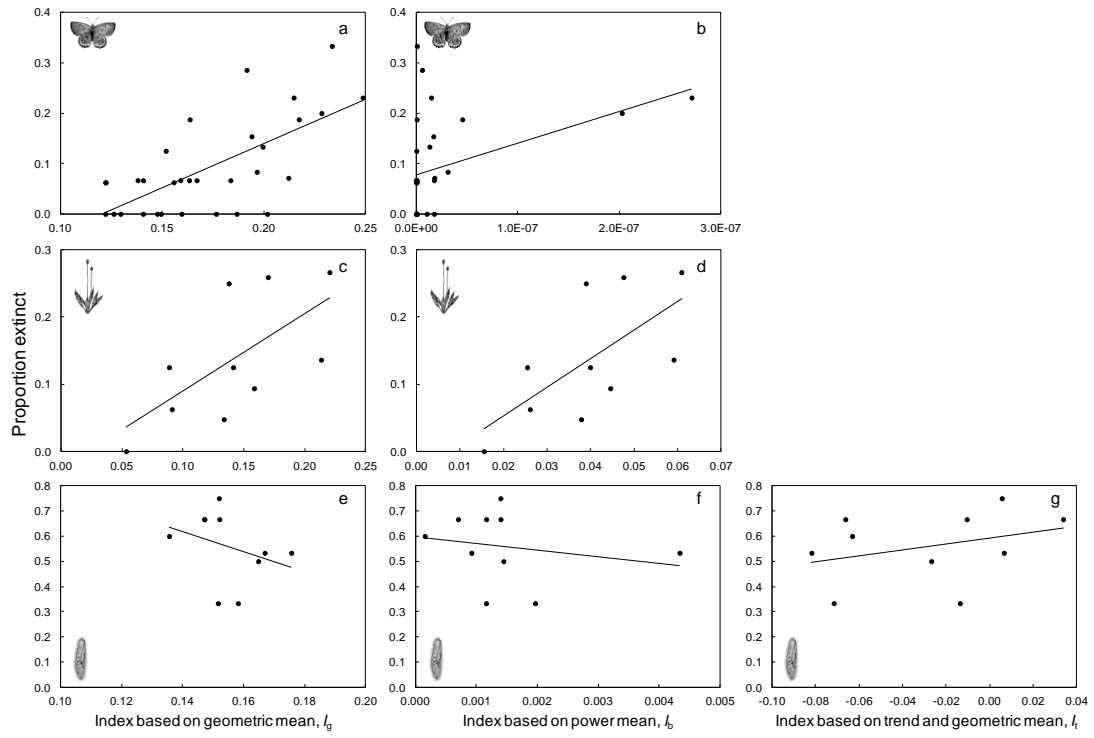

515  
516  
517  
518  
519  
520

521

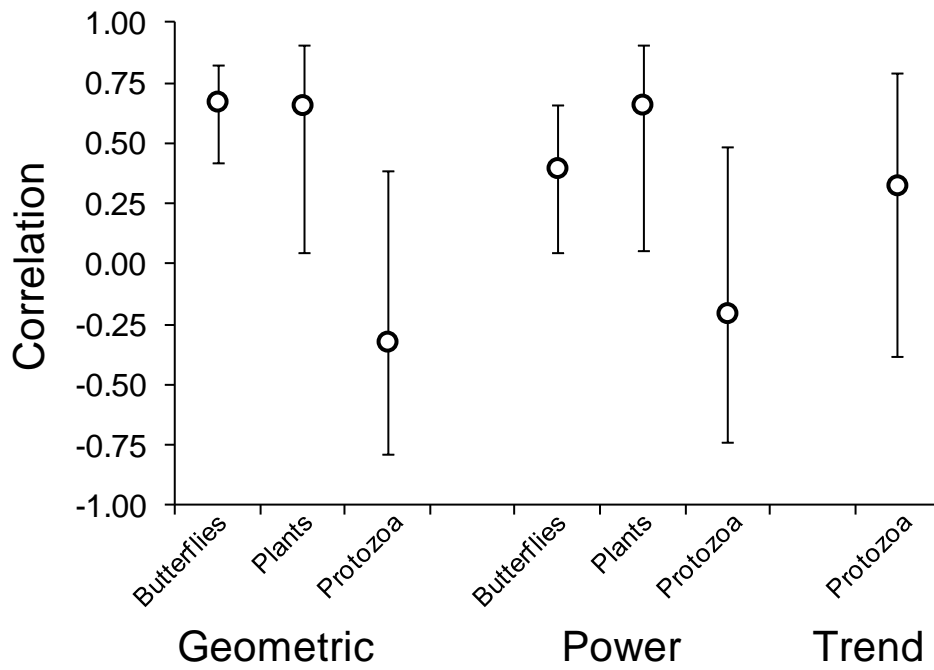

522  
523  
524  
525  
526

527  
528  
529  
530

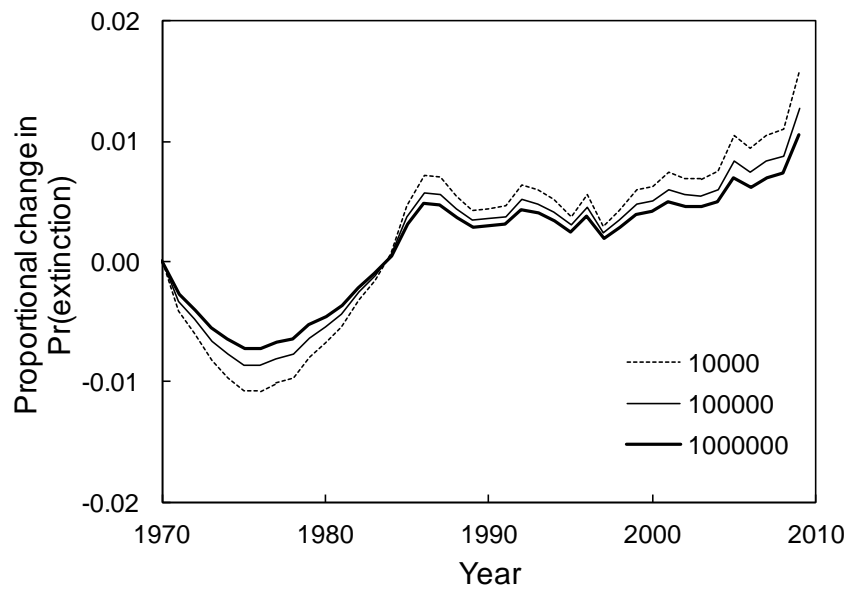

531  
532
